# Supplementary material for: Reductive surfactant-assisted one-step fabrication of a BiOI/BiOIO3 heterojunction biophotocatalyst for enhanced photodynamic theranostics overcoming tumor hypoxia
Source: Royal Society of Chemistry journal article supplement (doi:10.1039/c8nh00440d), 2019-01-01
Supplement: c8nh00440d1.pdf [file c8nh00440d1.pdf]

## SUPPORTING INFORMATION

Electronic Supplementary Material (ESI) for Nanoscale Horizons. This journal is © The Royal Society of Chemistry 2018

### Electronic Supplementary Information (ESI)

## Reductive Surfactant-Assisted One-Step Fabrication of BiOI/BiOI<sub>3</sub> Heterojunction Biophotocatalyst for Enhanced Photodynamic Theranostics Overcoming Tumor Hypoxia

Wenyao Zhen,<sup>a,b</sup> Yang Liu,<sup>b,c</sup> Xiaodan Jia,<sup>a</sup> Lie Wu,<sup>a</sup> Chao Wang<sup>a,b</sup> and Xiue Jiang<sup>\*,a,b</sup>

<sup>a</sup>State Key Laboratory of Electroanalytical Chemistry, Changchun Institute of Applied Chemistry, Chinese Academy of Sciences, Changchun 130022, Jilin, People's Republic of China.

<sup>b</sup>University of Science and Technology of China, Hefei 230026, Anhui, People's Republic of China.

<sup>c</sup>State Key Laboratory of Rare Earth Resource Utilization, Changchun Institute of Applied Chemistry, Chinese Academy of Sciences, Changchun 130022, Jilin, People's Republic of China

---

## Experimental Procedures

**Chemicals and Reagents:** Pentaerythritol tetrakis 3-mercaptopropionate (PTMP),  $\text{Bi}(\text{NO}_3)_3 \cdot 5\text{H}_2\text{O}$ ,  $\text{KIO}_3$ , KI, methacrylic acid (MAA), 5,5',6,6'-tetrachloro-1,1',3,3'-tetraethyl-benzimidazolylcarbocyanine iodide (JC-1), methyl thiazolyl tetrazolium (MTT), calcein acetoxymethyl ester (Calcein AM), propidium iodide (PI), 1,3-diphenylisobenzofuran (DPBF), 4,6-diamidino-2-phenylindole (DAPI), fluorescein isothiocyanate (FITC), methyl red (MR), 2,7-dichlorofluorescein diacetate (DCFH-DA) and  $[\text{Ru}(\text{dpp})_3]\text{Cl}_2$  (RDPP) were obtained from Sigma-Aldrich (America). 2,2'-Azobis(2-methylpropionitrile) (AIBN) was purchased from Shanghai Aladdin Reagent Co. (Shanghai, China). Singlet oxygen sensor green (SOSG) was purchased from Thermo Fisher Scientific Co. (Shanghai, China). Hydroxyphenyl fluorescein (HPF) was purchased from Shanghai Maokang Bio. Co. (Shanghai, China). Dulbecco's modified eagle's medium (DMEM) was purchased from Thermo Scientific Co. (Beijing, China). Standard fetal bovine serum (FBS) was purchased from Tianjin Kangyuan Biology Technology Manufacture Co., Ltd. (Tianjin, China). Hematoxylin-eosin (H&E), mito-tracker green, lyso-tracker red and adenosine 5'-triphosphate (ATP) assay kit were purchased from Beyotime Biotechnology Co., Ltd. (Shanghai, China). Inhibition and produce superoxide anion assay kit and the reduced glutathione assay kit were purchased from Nanjing Jiancheng Bioengineering Institute.

**Instruments:** TEM images and X-ray energy dispersive spectroscopy (EDS) spectrum were obtained by a FEI TECNAI G2 high-resolution transmission electron microscope operating with a field-emission gun operating at 200 kV. Scanning electron microscope (SEM) image was taken with a XL30 ESEM-FEG field-emission scanning electron microscope (FEL COMPANY, Netherlands). The UV-vis diffuse-reflectance spectrometry (DRS) spectra were obtained for the dry-pressed disk samples using a Hitachi U-3900 spectrometer equipped with an integrating sphere assembly. Nicolet 520 Fourier transform infrared (FTIR) spectrometer was used to obtain FTIR spectra. X-ray photoelectron spectra (XPS) were obtained by ESCALab220i-XL electron spectrometer. X-ray diffraction (XRD) spectrum was gained by a D8 ADVANCE X-ray diffractometer. The exact concentrations of Bi was detected by inductively coupled plasma atomic emission spectroscopy (ICP-AES, Thermo Scientific Xseries 2, Thermo Fisher Scientific, USA).

**Preparation of Trithiol-terminated Poly-(methacrylic acid) (PTMP-PMAA):** Ethanol (100 mL), MAA monomer (20 g), PTMP (2.267 g) and AIBN (0.19 g) were placed into a round-bottomed flask fitted with a reflux condenser under nitrogen with mechanical stirring, the mixture was reacted at 75°C for 5 h. The solvent was removed by a rotary evaporator (Germany, IKA-RV10 V-C) and the product was isolated by precipitating into ether (4 °C). The redundant solvent and monomer were removed by evaporation using a vacuum oven at 45 °C for 72 h.

**Preparation of BiOI/BiOIO<sub>3</sub> Nanocomposites (BB NCs), BiOIO<sub>3</sub> and BiOI:** HNO<sub>3</sub> was used to adjust the pH (pH 2.6) of PTMP-PMAA aqueous solution (5.70 mg mL<sup>-1</sup>). 3 mL of Bi(NO<sub>3</sub>)<sub>3</sub>·5H<sub>2</sub>O aqueous solution (0.06 g mL<sup>-1</sup>) was dropwise added into the above mixture. Then, 3 mL of KIO<sub>3</sub> dispersion aqueous liquid (0.11 g mL<sup>-1</sup>) was added and stirred for 30 min, the mixture was allowed to react at 180°C for 12 h in an oven. Finally, the products were obtained and further washed by ethanol for three times through centrifuging at 10000 rpm for 10 min and dried at 60°C for further use. The single BiOIO<sub>3</sub> was prepared according to above method without the addition of PTMP-PMAA. The single BiOI was also prepared according to above method without the addition of PTMP-PMAA and the KIO<sub>3</sub> was replaced by KI (3 mL, 0.085 g mL<sup>-1</sup>).

**Electrochemical Impedance Spectroscopy Measurements:** Metrohm autolab instrument was used to detect the electrochemical impedance. The platinum wire was used as the counter electrode, Ag/AgCl electrode was used as the reference electrode, and 100 μL of BiOI, BiOIO<sub>3</sub> or BB NCs suspension (1 mg mL<sup>-1</sup>) was drop-cast on the cleaned glassy carbon electrodes (GCE) to be served as the working electrode. Prior to that, the GCE was polished with 1.0 and 0.3 μm alumina powder, respectively, followed by sonication in ethanol solution and doubly distilled water successively. Electrochemical impedance spectroscopy experiments were carried out in a home-made three-electrode electrochemical cell. Nyquist plots were detected in 5 mM K<sub>3</sub>[Fe(CN)<sub>6</sub>]/K<sub>4</sub>[Fe(CN)<sub>6</sub>] (1:1) with 0.1 M KCl solution.

**Detection of Mott-Schottky:** Mott-Schottky plot was detected in 1 mol L<sup>-1</sup> Na<sub>2</sub>SO<sub>4</sub> aqueous solution with frequencies of 3000 Hz. The Platinum wire was acted as the counter electrode, Ag/AgCl electrode was used as the reference electrode, and 100 μL of BiOI and BiOIO<sub>3</sub> suspension (1 mg mL<sup>-1</sup>) was drop-cast on the cleaned glassy carbon electrodes (GCE) to be acted as working electrode. Then, the impedance at 3000 Hz was detected.

**In Vitro Detection of •OH:** HPF was used to detect the generation of •OH. Typically, 1 mL BB NCs aqueous solution (80 μg mL<sup>-1</sup>) containing with HPF (1 μM) were irradiated by 650 nm laser (0.5 W cm<sup>-2</sup>), the fluorescence of HPF was detected after 15 min. HPF aqueous solution with laser served as control. To demonstrate the addition of H<sub>2</sub>O<sub>2</sub> can enhance the generation of •OH, BB NCs dispersion (80 μg mL<sup>-1</sup>) containing with H<sub>2</sub>O<sub>2</sub> (100 μM) and HPF (1 μM) was also irradiated by 650 nm laser (0.5 W cm<sup>-2</sup>), the fluorescence was detected after 15 min. The fluorescence of HPF in 520 nm (excitation: 488 nm) was measured. Notably, to detect the content of •OH in hypoxia condition, all of the above-mentioned solutions were irradiated by 650 nm laser after aerating the solution with nitrogen for 10 min.

**In Vitro Generation of O<sub>2</sub>:** The content of O<sub>2</sub> was measured by the portable dissolved oxygen meter. Typically, 25 mL of BB NCs aqueous solutions (40, 80 μg mL<sup>-1</sup>) were irradiated by 650 nm laser (0.5 W cm<sup>-2</sup>), during the irradiation process, the concentration of the generated O<sub>2</sub> was recorded every 10 seconds.

**In Vitro Detection of Singlet Oxygen (<sup>1</sup>O<sub>2</sub>) by SOSG:** SOSG was used for detecting the generation of <sup>1</sup>O<sub>2</sub>. Typically, 10 μL of

---

SOSG solution (50  $\mu\text{M}$ ) was added into 1 mL of BB NCs aqueous solution (80  $\mu\text{g mL}^{-1}$ ). Then, the mixture was irradiated by 650 nm laser (0.5  $\text{W cm}^{-2}$ ), the fluorescence in 525 nm (excitation: 488 nm) was measured 15 min. Notably, to detect the content of  $^1\text{O}_2$  in hypoxia condition, all of the above-mentioned solutions were irradiated by 650 nm laser after aerating the solution with  $\text{N}_2$  for  $\sim 10$  min.

***In Vitro* Detection of Superoxide Anion ( $\bullet\text{O}_2^-$ ):**  $\bullet\text{O}_2^-$  was detected through inhibition and produce superoxide anion assay kit. The BB NCs aqueous solution (80  $\mu\text{g mL}^{-1}$ , 50 mL) was added to 1.3 mL of test solutions, respectively. Then, the mixture was irradiated by 650 nm laser (0.5  $\text{W cm}^{-2}$ ) for 15 min, and the mixtures were incubated at 37°C for 40 min. Then, the mixture was centrifuged at 10000 rpm. Then, 2 mL of the chromogenic agent was added to above solutions and kept at 25 °C for 10 min, the absorbance at 550 nm was measured by UV-vis absorption spectroscopy. The BB NCs aqueous solution without the illumination served as control.

***In Vitro* Detection of  $\bullet\text{O}_2^-$  or  $^1\text{O}_2$  by DPBF:** DPBF can response to  $\bullet\text{O}_2^-$  and  $^1\text{O}_2$ , DPBF was employed to evaluate the ROS production of BB NCs by UV-vis absorption spectra. 15  $\mu\text{L}$  of DPBF solution (10 mM in ethanol) was added into 990  $\mu\text{L}$  of BB NCs (80  $\mu\text{g mL}^{-1}$ ) ethanol aqueous solution (ethanol:  $\text{H}_2\text{O}$  = 4:6) with or without  $\text{NaN}_3$  (10 mM). Then, the mixture was irradiated with a 650 nm laser for 15 min (0.5  $\text{W cm}^{-2}$ ). Then, the sample was centrifuged at 10000 rpm for 10 min. Afterwards, the absorbance of DPBF at 410 nm was recorded. The group without laser was used as control. Furthermore, BB NCs (80  $\mu\text{g mL}^{-1}$ ) ethanol aqueous solution (ethanol:  $\text{H}_2\text{O}$  = 4:6) with p-benzoquinone (BQ, 1 mM) was also detected according to the above procedures.

**Detection of  $\bullet\text{OH}$  by Terephthalic Acid (TA):** The detection of  $\bullet\text{OH}$  was further verified according to the reaction of TA and  $\bullet\text{OH}$ . 3 mL of BB NCs aqueous solution (80  $\mu\text{g mL}^{-1}$ , 0.1 M acetate buffer (pH = 4.0)) containing TA (0.5 mM) was stirred in the darkness for 30 min to establish an adsorption-desorption equilibrium. Then, the mixture was exposed to a 650 nm laser (0.5  $\text{W cm}^{-2}$ ) for 30 min. After that, above liquid was centrifuged to remove nanomaterials. The changes in the 435 nm fluorescence emission peak were recorded with the excitation wavelength was 315 nm.

**Degradation of MR:** The generation of  $\bullet\text{OH}$  was also demonstrated by photodegradation of MR under visible light irradiation (650 nm laser, 0.5  $\text{W cm}^{-2}$ ). Typically, 10 mg MR was dissolved into 5 mL of DMF. Then, 2.977 mL of BB NCs (80  $\mu\text{g mL}^{-1}$ ) aqueous solution was added into 23  $\mu\text{L}$  of MR solution (2  $\text{mg mL}^{-1}$ ) and the suspensions were stirred in the darkness for 30 min to establish an adsorption-desorption equilibrium. Then, the mixture was exposed to a 650 nm laser (0.5  $\text{W cm}^{-2}$ ) for different times (0, 5, 10, 20 and 30 min). After that, the above liquid was centrifuged to remove nanomaterials. The absorbance at 522 nm was measured by UV-vis spectroscopy to evaluate the content of MR.

**The Evaluation of Photothermal Response of BB NCs:** 1 mL of BB NCs aqueous solutions (80  $\mu\text{g mL}^{-1}$ ) was added into a

---

quartz cell and exposed to 650 nm laser ( $0.5 \text{ W cm}^{-2}$ ) for 15 min. A thermocouple probe was used to record real-time temperature every 30 s, the temperature variation of  $\text{H}_2\text{O}$  was also detected. Thermal imaging was also recorded through the infrared thermal imaging camera (FLIR E50, Fluke, USA) every 2 min during the irradiation.

**Biocompatibility of BB NCs:** HeLa cells were seeded into 96-well plates in normoxia (21%  $\text{O}_2$ ) or hypoxia (2%  $\text{O}_2$ ) condition at  $37^\circ\text{C}$  for 12 h. BB NCs solutions (0, 25, 50, 100, 200, 300  $\mu\text{g mL}^{-1}$  in DMEM medium) were added into each well and cells were continued to be cultured for another 24 h. Cells were rinsed three times and then 100  $\mu\text{L}$  of MTT PBS solution (0.5  $\text{mg mL}^{-1}$ ) was added to each well. After that, cells were incubated for another 5 h at  $37^\circ\text{C}$ , and PBS was abandoned. Then, 200  $\mu\text{L}$  of DMSO was added into each well and the absorbance at 570 nm was detected by a plate reader.

**Cell Uptaken of BB NCs:** Firstly, we prepared FITC labeled BB NCs. Typically, 0.5 mL of FITC aqueous solution (2  $\text{mg mL}^{-1}$ ) was slowly added into 20 mL of BB NCs aqueous solution (200  $\mu\text{g mL}^{-1}$ ) and vigorously stirred for 12 h in the dark. Then, the above solution were further washed by water through centrifugation for three times and collected. HeLa cells were seeded into culture dishes and incubated in culture medium in 5%  $\text{CO}_2$  at  $37^\circ\text{C}$  for 24 h. Then, cells were incubated with 1 mL of FITC-BB NCs (80  $\mu\text{g mL}^{-1}$  in DMEM medium) for 12 h. Then, cells were washed three times with PBS. Cells were further incubated with DAPI (10  $\mu\text{g mL}^{-1}$ , blue) and lyso-tracker red (0.1  $\mu\text{M}$ , red) in DMEM medium for 50 min, then cells were rinsed again with PBS for three times. Afterwards, the fluorescence of cells was imaged using a CLSM. Light emission of DAPI (420 nm  $\sim$  500 nm), lyso-tracker red (580 nm  $\sim$  620 nm), FITC (500 nm  $\sim$  550 nm), at the excitation of 405 nm, 488 nm, 543 nm, 488 nm, and 633 nm, respectively.

**The Generation of  $\bullet\text{OH}$  in HeLa Cells:** HeLa cells ( $2.5 \times 10^4$  cells per dish) were seeded into culture dishes and incubated at  $37^\circ\text{C}$  in 5%  $\text{CO}_2$  for 24 h, respectively. Then, cells were incubated with HPF (10  $\mu\text{M}$  in DMEM medium) for another 40 min. After that, each culture dish was rinsed with PBS for three times and further incubated with 1 mL of BB NCs solution (80  $\mu\text{g mL}^{-1}$  in DMEM medium) for 24 h. The cells were further rinsed three times by PBS, and each culture dish was then added into 1 mL of DMEM medium containing  $\text{H}_2\text{O}_2$  (100  $\mu\text{M}$ ) and irradiated with the 650 nm laser ( $0.5 \text{ W cm}^{-2}$ ) for 15 min. Cells were continued to be cultured for another 12 h. After that, the cells were further rinsed three times by PBS and the fluorescence of the cells was imaged with CLSM using an excitation of 488 nm, the emission was collected between 500 and 600 nm. Whatsmore, to distinguish the effects in normoxia and hypoxia condition, we incubated cells in 21%  $\text{O}_2$  and 2%  $\text{O}_2$  condition, respectively. Cells only with treatment of laser served as control group, and individual  $\text{H}_2\text{O}_2$ /laser-treated and BB NCs/laser-treated cells were also conducted according to above procedures.

**The Generation of  $\text{O}_2$  in HeLa Cells:** HeLa cells were seeded into culture dishes and incubated at  $37^\circ\text{C}$  in 5%  $\text{CO}_2$  for 24 h, respectively. Then, cells were incubated with RDPP (10  $\mu\text{M}$  in DMEM medium) for 4 h. After that, culture dishes were

---

washed by PBS and incubated with 1 mL of BB NCs ( $80 \mu\text{g mL}^{-1}$  in DMEM medium) for 24 h. The cells were further rinsed three times with PBS, then each culture dish was then added into 1 mL of DMEM medium and irradiated with the 650 nm laser ( $0.5 \text{ W cm}^{-2}$ ) for 15 min. Cells were further incubated for 12 h. After that, the cells were washed for three times by PBS and the fluorescence of the cells was imaged with CLSM using an excitation of 488 nm, the emission was collected between 600 and 700 nm. Whatsmore, to distinguish the effects in normoxia and hypoxia condition, we incubated cells in 21%  $\text{O}_2$  and 2%  $\text{O}_2$  condition, respectively. Cells without treatment of BB NCs or laser served as control group, and individual BB NCs-treated and laser-treated cells were also conducted according to above procedures.

**The Generation of  $^1\text{O}_2$  in HeLa Cells:** HeLa cells were seeded into culture dishes and incubated at  $37^\circ\text{C}$  in 5%  $\text{CO}_2$  for 24 h, respectively. Then, cells were incubated with SOSG ( $10 \mu\text{M}$  in DMEM medium) for another 30 min. After that, each culture dish was rinsed with PBS for three times and further incubated with 1 mL of BB NCs solution ( $80 \mu\text{g mL}^{-1}$  in DMEM medium) for 24 h. The cells were further rinsed three times with PBS, then each culture dish was then added into 1 mL of DMEM medium and then irradiated with the 650 nm laser ( $0.5 \text{ W cm}^{-2}$ ) for 15 min. Cells were continued to be cultured for another 12 h. Finally, the cells were further rinsed three times by PBS and the fluorescence of the cells was imaged with CLSM using an excitation of 488 nm, the emission was collected between 500 and 650 nm. Whatsmore, to distinguish the effects in normoxia and hypoxia condition, we incubated cells in 21%  $\text{O}_2$  and 2%  $\text{O}_2$  condition, respectively. Cells without treatment of BB NCs or laser served as control group, and individual BB NCs-treated and laser-treated cells were also conducted according to above procedures.

**Generation of ROS Detected by DCFH-DA:** HeLa cells ( $2.5 \times 10^4$  cells per dish) were seeded into culture dishes and incubated at  $37^\circ\text{C}$  in 5%  $\text{CO}_2$  for 24 h, respectively. Then, cells were incubated with DCFH-DA ( $10 \mu\text{M}$  in DMEM medium) for another 30 min. After that, each culture dish was rinsed with PBS for three times and further incubated with 1 mL of BB NCs solution ( $80 \mu\text{g mL}^{-1}$  in DMEM medium) for 24 h. The cells were further rinsed for three times with PBS, then each culture dish was then added into 1 mL of DMEM medium and then irradiated with the 650 nm laser ( $0.5 \text{ W cm}^{-2}$ ) for 15 min. Cells were continued to be cultured for another 12 h. Finally, the cells were further rinsed three times by PBS and the fluorescence of the cells was imaged with CLSM using an excitation of 488 nm, the emission was collected between 500 and 650 nm. Whatsmore, to distinguish the effects in normoxia and hypoxia condition, we incubated cells in 21%  $\text{O}_2$  and 2%  $\text{O}_2$  condition, respectively. Cells without treatment of BB NCs or laser served as control group, and individual BB NCs-treated and laser-treated cells were also conducted according to above procedures.

**Detection of Mitochondrial Membrane Potential (MMP):** The MMP in cells was observed by JC-1 through CLSM. For CLSM imaging, the HeLa cells were seeded in culture dishes at  $37^\circ\text{C}$  for 24 h. Then, cells were added into BB NCs ( $80 \mu\text{g mL}^{-1}$  in

DMEM medium). After 24 h, the medium was removed and the cells were washed by PBS. After that, 1 mL of DMEM medium were added, cells were irradiated through 650 nm laser ( $0.5 \text{ W cm}^{-2}$ ) for 15 min. Subsequently, the cells were incubated for another 12 h and stained by JC-1 ( $2.5 \mu\text{g mL}^{-1}$  in PBS) for 20 min at  $37^\circ\text{C}$ . After that, the cells were rinsed by JC-1 buffer solution, and investigated by CLSM. The JC-1 monomer was measured on the green emission channel (510 ~ 540 nm), and JC-1 aggregate was measured on the red emission channel (570 ~ 620 nm) at the laser excitation wavelength is 488 nm. Cells without treatment of BB NCs or laser were acted as control, and individual BB NCs-treated and laser-treated cells were also conducted on the basis of above procedures.

**In Vitro PDT:** HeLa cells were seeded in 96-well plates and incubated according to the above mentioned procedures. Then, cells were incubated with 200  $\mu\text{L}$  of BB NCs with different concentrations (0, 10, 20, 40, 80  $\mu\text{g mL}^{-1}$  in DMEM medium) for 24 h in the same condition, respectively. Then, cells were washed by PBS for three times and 200  $\mu\text{L}$  of fresh DMEM medium was added. Afterwards, cells were exposed to 650 nm laser ( $0.5 \text{ W cm}^{-2}$ ) for 15 min. After illumination, cells were incubated for another 12 h. Control group was placed in the same conditions without irradiation. The cell viability was detected by MTT assay and observed on a CLSM stained by Calcein AM ( $8 \times 10^{-8} \text{ M}$  in PBS) and PI ( $5 \times 10^{-7} \text{ M}$  in PBS) for 20 min. Whatsmore, to distinguish the therapeutic effects in normoxia and hypoxia condition, we incubated cells in 21%  $\text{O}_2$  and 2%  $\text{O}_2$  condition, respectively.

**Detection of Adenosine 5'-Triphosphate (ATP) Content:** The concentration of intracellular ATP was detected using commercially available ATP assay kit. HeLa cells were seeded into 6-well plates and incubated at  $37^\circ\text{C}$  in 5%  $\text{CO}_2$  for 24 h. 1 mL of BB NCs ( $80 \mu\text{g mL}^{-1}$  in DMEM medium) was added and incubated for 24 h in the same condition. After that, cells were swilled by PBS for three times and 1mL of fresh DMEM medium was added. Afterwards, cells were exposed to 650 nm laser ( $0.5 \text{ W cm}^{-2}$ ) for 15 min. After illumination, cells were incubated for another 12 h. After that, cells in each wells were added into 200  $\mu\text{L}$  of cell lysis buffer for 5 min, cells were collected and centrifuged at 12000 rpm for 5 min. ATP content of above supernatant was detected by measuring the luminescence by microplate reader.

**Animal Tumor Model and In Vivo PDT:** Female Kunming mice (20~25 g) were used to obtain the xenograft uterine cervical cancer cells (U14) tumor models. U14 cells in 100  $\mu\text{L}$  of PBS were subcutaneously injected into the right alar area of the mice. While the tumors grow to  $\sim 100 \text{ mm}^3$ , the mice were divided into four groups: (a) PBS; (b) BB NCs ( $80 \mu\text{g mL}^{-1}$ , 200  $\mu\text{L}$ ); (c) PBS/Laser and (d) BB NCs ( $80 \mu\text{g mL}^{-1}$ , 200  $\mu\text{L}$ ). Each mouse was intravenously injected every two days. At 24 h post-injection, tumors of relevant groups were irradiated by 650 nm laser ( $0.5 \text{ W cm}^{-2}$ ) for 15 min. On the one hand, the tumor size was detected by digital calliper, tumor volumes were calculated on the basis of the following fomula:  $Volume = (Length \times Width^2) \div 2$ ; on the other hand, the body weight of mice was also recorded every two days to assess

---

long-term *in vivo* toxicity. At 15th day, some of the tumors at different treatments groups were dissected and weighed.

**Histology Staining:** While the mice were treated on the 7th day, the tumor tissues were dissected from some of the mice in different treatments and fixed in 10% neutral buffered formalin and processed into paraffin. After some of the mice were treated on the 30th day, the main normal organs were also dissected and treated according to the same procedures. All of the tissues were sliced and stained for hematoxylin and eosin (H&E) staining, all of the tissues were investigated by a digital microscope (Leica QWin). Tumors were also stained by hypoxia-inducible factor (HIF-1 $\alpha$ ) and investigated.

**Detection of Blood Parameters:** 12 tumor-bearing mice were used to examine the blood parameters and they were separated into four groups. The mice were conducted as follows: (a) PBS; (b) BB NCs (0.64 mg kg<sup>-1</sup>); (c) PBS/laser and (d) BB NCs/laser (0.64 mg kg<sup>-1</sup>), each mouse was intravenously injected. At 24 h post-injection, tumors on mice of treatment group were irradiated by 650 nm laser (0.5 W cm<sup>-2</sup>) for 15 min. On the 30th day, blood of above mice was collected from the eye socket. The blood of healthy mice was used as control. Then, the complete blood was measured by the automatic blood analyzer using protocols approved by China-Japan union hospital of Jilin University.

**CT Imaging:** CT imaging was obtained by Philips 256-slice CT scanner (Philips Medical System). BB NCs aqueous solutions with different concentrations (0.32, 0.63, 1.25, 2.5, 5, 10 mg mL<sup>-1</sup>) were placed in 1.5 mL tubes. For *in vivo* CT imaging, the tumor-bearing mouse was intratumor injected with BB NCs (0.64 mg kg<sup>-1</sup>). CT images were acquired before and after injection. Images were reformed to coronal images by a computational technique referred to as multiplanar-reconstruction.

**Distribution of BB NCs:** BB NCs (0.64 mg kg<sup>-1</sup>) were intravenously injected into the tumor-bearing mice (n = 3). After 24 h, mice were dissected, main normal organs and tumor were collected, organs were weighted and dissolved in digesting aqua regia (HNO<sub>3</sub>:HCl = 1:3) for 48 h. The average tumor weight was about 0.1069 g (~100 mm<sup>3</sup>). The amounts of Bi in different samples were measured by ICP-AES.

**Excretion Trace of BB NCs:** BB NCs (0.64 mg kg<sup>-1</sup>) were intravenously injected into mice (n = 3). And mice were placed in a metabolism cage. The feces and urine were collected and weighted every 12 h, and the contents of Bi were detected by ICP-AES.

**Blood Circulation of BB NCs:** BB NCs (2.5 mg kg<sup>-1</sup>, equal to the 1.17 mg kg<sup>-1</sup> of Bi content) were intravenously injected into the SD rats (300 g), and the blood were collected and weighted at different time points (10 min, 30min, 1h, 2h, 4h, 6h, 8h, 12h, 24 h). The blood samples were weighted and dissolved in digesting aqua regia (HNO<sub>3</sub>:HCl = 1:3) for 48 h. The concentrations of Bi in the blood samples were detected by ICP-AES.



## Results and Discussion

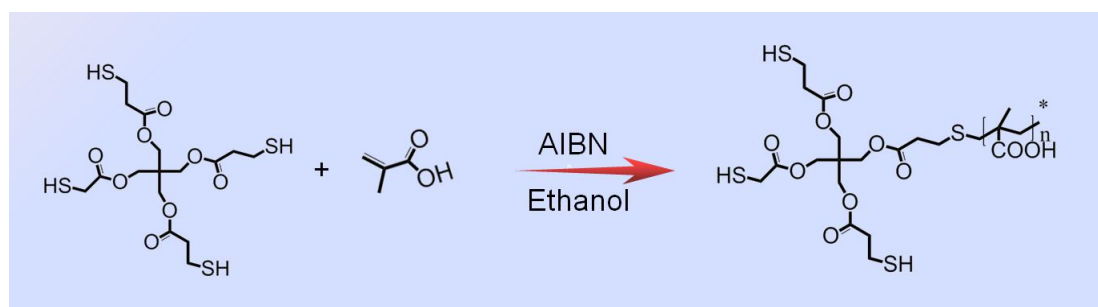

**Fig. S1** Schematic illustration of the preparation process of PTMP-PMAA.

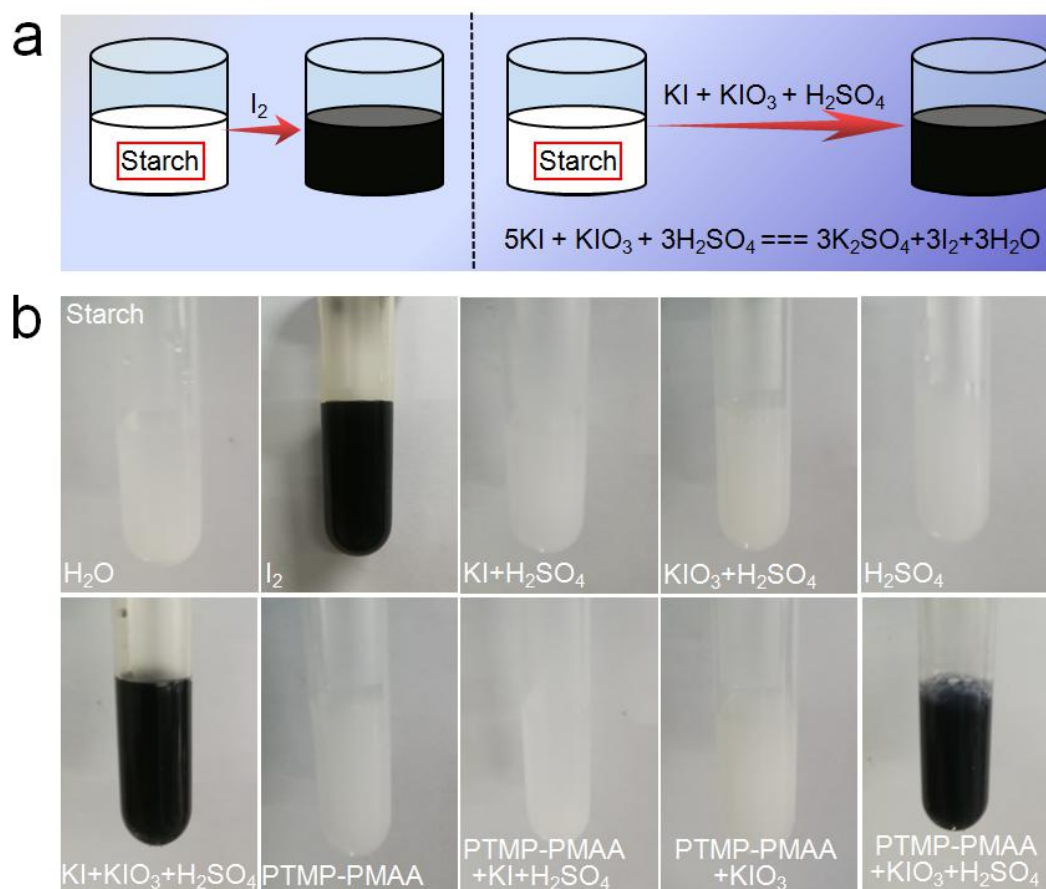

**Fig. S2** Demonstration of the generation of I<sup>-</sup> during the interaction of PTMP-PMAA with KIO<sub>3</sub>.

When starch is mixed with iodine, the starch is highly sensitive color change from brown to blue and have been used to indicate the endpoint of iodine titration.<sup>1</sup> On the other hand, KIO<sub>3</sub> and KI can be converted into iodine by addition of sulfuric acid.<sup>2</sup> The coexistence of I<sup>-</sup> and IO<sub>3</sub><sup>-</sup> can be identified by using starch as an external indicator, and the reaction is expressed as Figure S2a. In addition, the -SH of our used surfactant (PTMP-PMAA) can reacted with KIO<sub>3</sub> and generate KI (Figure S2b),<sup>3</sup> which can be demonstrated by the blue color showed in the PTMP-PMAA + KIO<sub>3</sub> + H<sub>2</sub>SO<sub>4</sub> group.

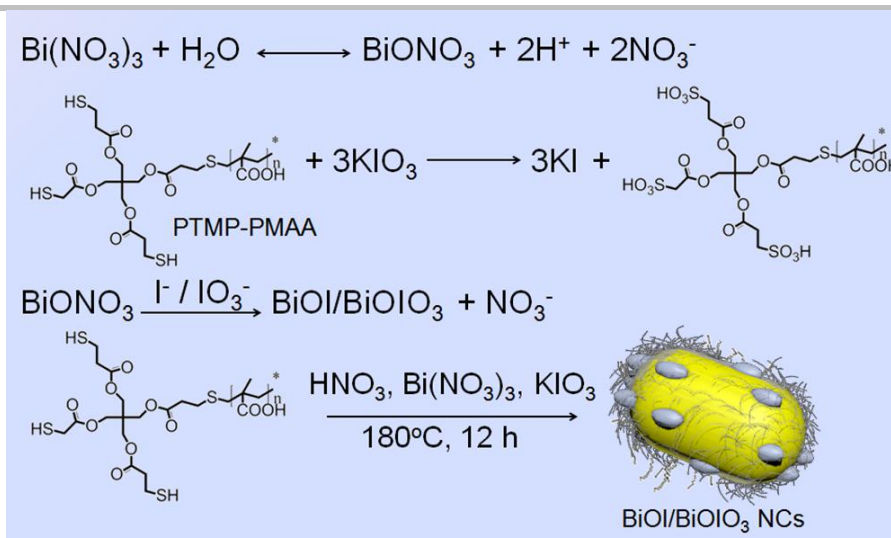

**Fig. S3** Schematic illustration of synthetic process of BB NCs.

When bismuth nitrate pentahydrate was dispersed in the water, at the beginning,  $\text{Bi}^{3+}$  cations reacted with  $\text{H}_2\text{O}$  to form  $\text{Bi}(\text{OH})_2^+$ , when the pH value of the precursor is suddenly decreased and then  $\text{H}^+$  concentration increased, the reaction prefer to the left direction and finally decrease the amount of  $\text{Bi}(\text{OH})_2^+$  and  $\text{BiONO}_3$ ,<sup>4</sup> which inhibits the growing of  $\text{BiONO}_3$  into big size. The  $-\text{SH}$  of our used surfactant (PTMP-PMAA) can be reacted with  $\text{KIO}_3$  and generate  $\text{KI}$  (Fig. S3).<sup>5</sup>  $\text{BiONO}_3$  can be transformed to  $\text{BiOIO}_3$  and  $\text{BiOI}$  by combined with  $\text{IO}_3^-$  and  $\text{I}^-$ , and the uniform  $\text{BiOI/BiOIO}_3$  heterostructure nanocomposites (BB NCs) were prepared through this one step hydrothermal method.

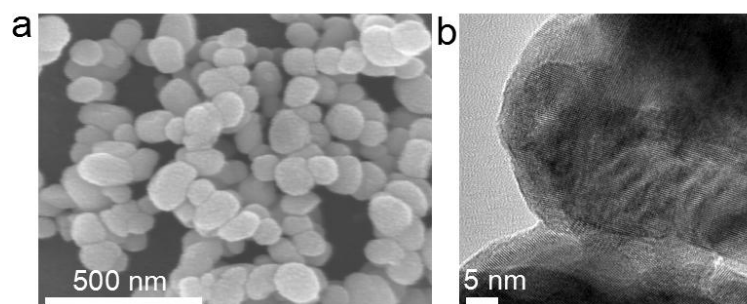

**Fig. S4** (a) SEM image of BB NCs. (b) Enlarged TEM image of BB NCs.

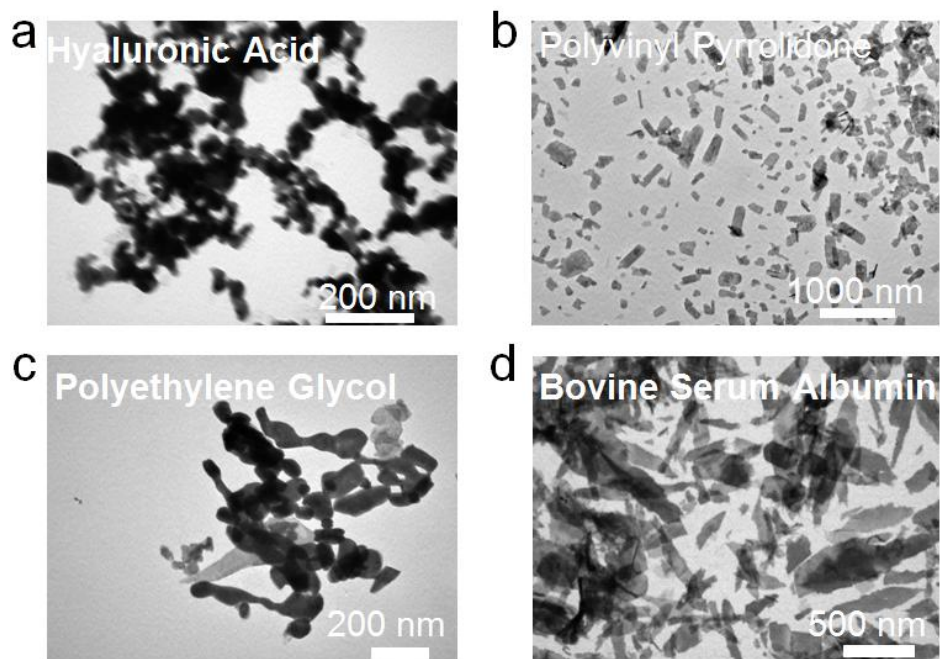

**Fig. S5** TEM images of products prepared through the same procedures as BB NCs using different surfactants.

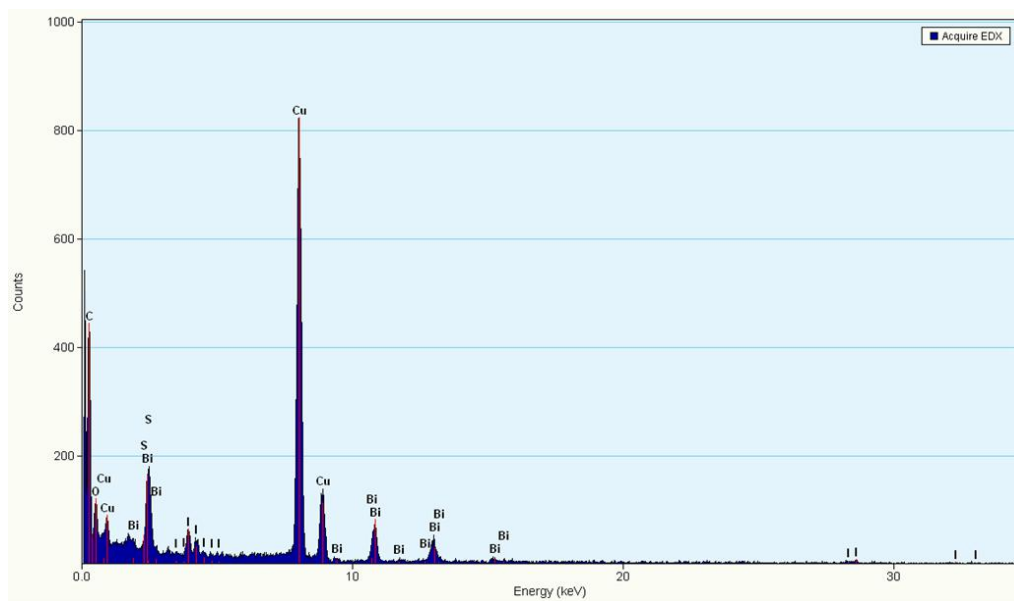

**Fig. S6** EDS of BB NCs.

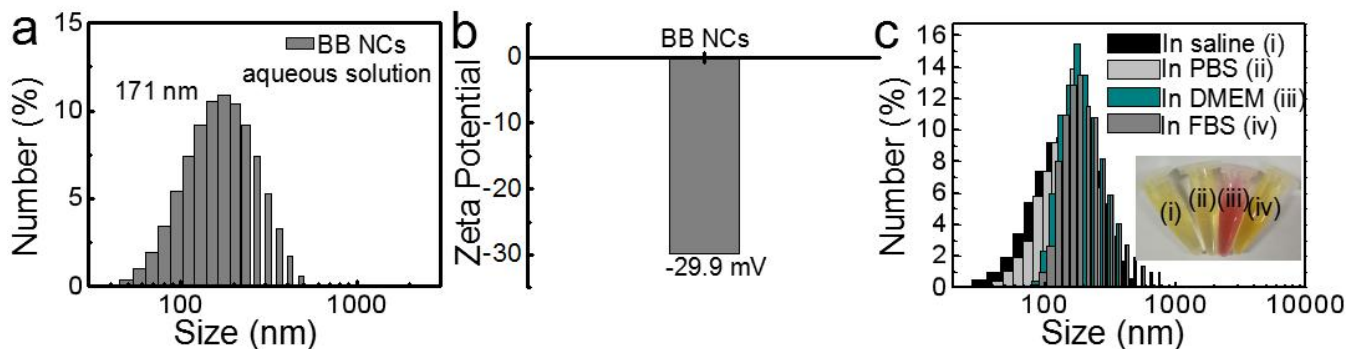

**Fig. S7** Hydrodynamic size (a) and  $\xi$ -potential (b) of BB NCs aqueous solution. (c) Hydrodynamic size of BB NCs in saline, PBS, DMEM medium and 80% of FBS.

The as-prepared BB NCs disperse well in water, and the hydrodynamic size is about 171 nm (Fig. S7a) and  $\xi$ -potential of -29.9 mV (Fig. S7b). To further test the stability of the BB NCs in saline, PBS, DMEM medium and FBS, we dispersed BB NCs in saline, PBS, DMEM medium and 80% of FBS for 2 d. We measured their hydrodynamic size (Fig. S7c). The results are shown in Fig. S7c, BB NCs showed reasonable stability as the hydrodynamic size of BB NCs did not change apparently.

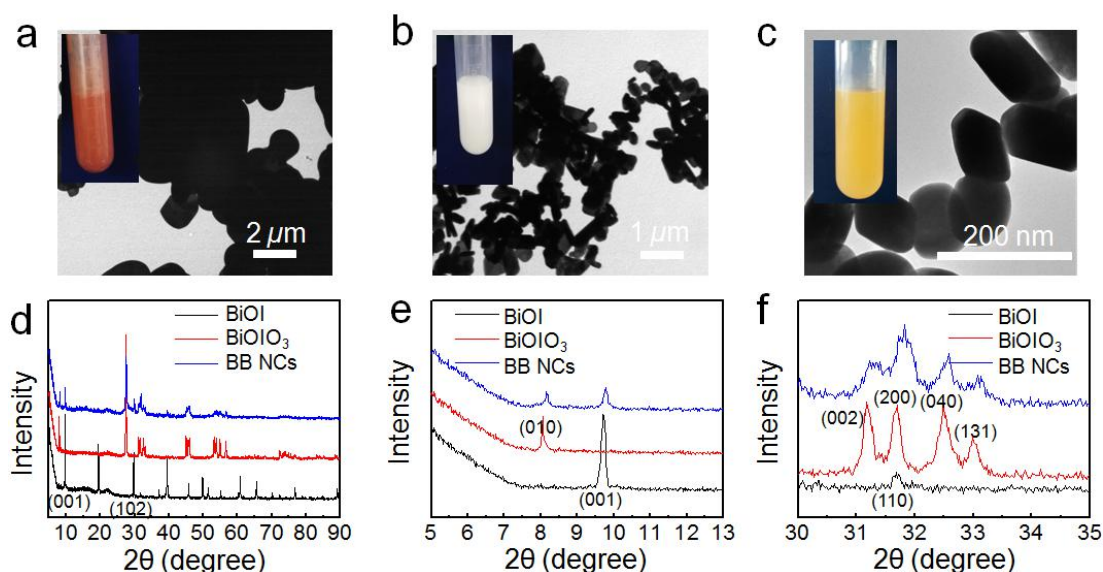

**Fig. S8** TEM images and photos (insets) of BiOI (a), BiOI<sub>3</sub> (b) and BB NCs (c). (d) XRD spectra of BiOI, BiOI<sub>3</sub> and BB NCs. (e) Enlarged XRD spectra of BiOI, BiOI<sub>3</sub> and BB NCs in the range of 5~13 degree. (f) Enlarged XRD spectra of BiOI, BiOI<sub>3</sub> and BB NCs in the range of 30~35 degree.

To compare the structure of BB NCs to single BiOI<sub>3</sub> and BiOI, we also prepared pure BiOI and BiOI<sub>3</sub> which aqueous solution show brick red and white, respectively (Fig. S8a, b). From the XRD spectra (Fig. S8d-f) of our obtained BiOI (black line), BiOI<sub>3</sub> (red line) and BB NCs (blue line), we can find that all of them have sharp diffraction peaks, indicating they were well crystallized. In addition, our obtained BiOI sample was in agreement with tetragonal phase of BiOI (JCPDS file 10-0445),<sup>6</sup> and the XRD peaks of our prepared BiOI<sub>3</sub> was in good agreement with the orthorhombic BiOI<sub>3</sub> (ICSD #

262019).<sup>5</sup> The XRD spectrum of BB NCs was also shown in Fig. S8d, both of the diffraction peaks of BiOI and BiOIO<sub>3</sub> can be observed. Most of the typical peaks of BB NCs are similar to those of BiOIO<sub>3</sub> except the appearance of the peaks at 9.658° and 29.645° belonging to (001) and (102) peaks of BiOI. Specifically, from the enlarged XRD spectra (Fig. S8e,f), the BB NCs have (010) peak compared with pure BiOIO<sub>3</sub>, and the ratio of (040)/(002) is increased compared to that of pure BiOIO<sub>3</sub>. Above XRD data suggests the coexistence of BiOIO<sub>3</sub> and BiOI.<sup>6,7</sup> According to the enlarged XRD spectra (Fig. S8e, S8f) ranging from 30-35 degree, the (010) and (040) peaks of BB NCs offset to a large angle to a certain extent compared to that of pure BiOIO<sub>3</sub>, which comes from the absorption of BB NCs shifted towards the long wavelength.<sup>7</sup>

In addition, the HRTEM image (Fig. 1d) indicates that the lattice fringes with the interplanar space of 0.302 nm matching the spacing of the (102) crystal plane of BiOI, and 0.280 nm matching the spacing of the (110) crystal plane of BiOI, coupled with the XRD spectrum of BiOI (Fig. S8d-f), we can conclude that the main exposed facet of BiOI is {001} facet. The exposed {001} facets of BiOI can promote the photocatalytic activity, which comes from the effective separation of photogenerated e<sup>-</sup>-h<sup>+</sup> on {001} facets.<sup>7</sup> Besides, the interplanar spacing of the clear lattice fringe of 0.287 nm is in accordance with the (002) crystal plane of BiOIO<sub>3</sub>, combined with the XRD spectrum of BiOIO<sub>3</sub> (Fig. S8d), the dominantly exposing facet of BiOIO<sub>3</sub> may be {010} facet. From Fig. 1f, we can also conclude that the BiOI was formed on the surface of BiOIO<sub>3</sub>, which suggests that the BiOI/BiOIO<sub>3</sub> heterostructures (BB NCs) were synthesized, the BiOI and BiOIO<sub>3</sub> layers contacted intimately. As it is reported that the {001} facet and {010} facet are the reactive crystal facets of BiOI and BiOIO<sub>3</sub>, respectively,<sup>6</sup> the coupling of the two kinds of reactive crystal facets is beneficial to the separation and transfer of charge carriers.

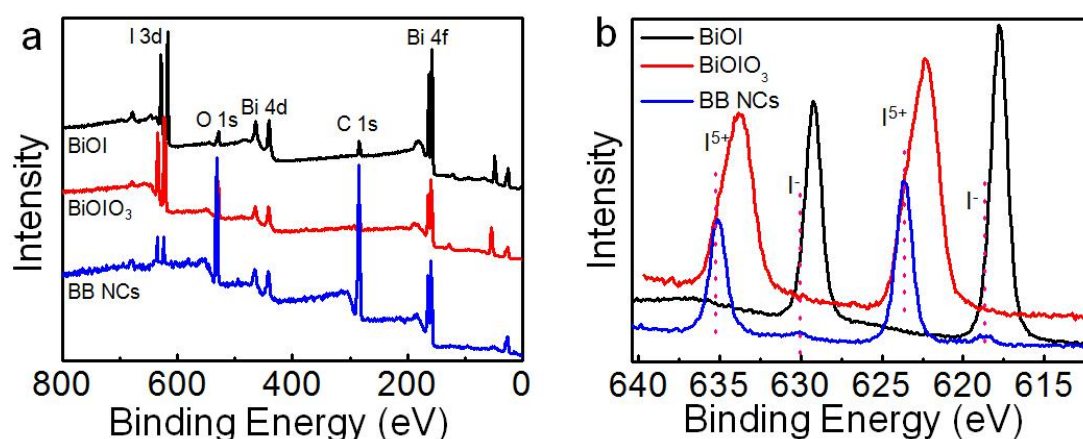

**Fig. S9** XPS spectra of BiOI, BiOIO<sub>3</sub> and BB NCs.

The XPS spectra of BiOIO<sub>3</sub>, BiOI and BB NCs were used to investigate the chemical compositions and surface states. The XPS survey spectra of BiOIO<sub>3</sub>, BiOI and BB NCs indicate that the three samples contain Bi, O, I elements (Fig. S9). From Fig. S9a, two peaks around 164.1 and 158.74 eV are indexed to Bi 4f<sub>5/2</sub> and Bi 4f<sub>7/2</sub>, indicating the presence of Bi<sup>3+</sup> in BiOIO<sub>3</sub>, BiOI and BB NCs.<sup>7,8</sup> And two peaks around 630.4 eV (I 3d<sub>3/2</sub>) and 618.9 eV (I 3d<sub>5/2</sub>) could be ascribed to the I<sup>-</sup> in BiOI, two strong

peaks at 635.05 and 623.6 eV are the  $I 3d_{3/2}$  and  $I 3d_{5/2}$  states of  $I^{5+}$  in  $BiOIO_3$  (Fig. S9a). From Fig. S9b, BB NCs show two sets of  $I_{3d}$  peaks, and the two strong peaks around 635.05 and 623.6 eV are the  $I 3d_{3/2}$  and  $I 3d_{5/2}$  states of  $I^{5+}$ , whereas the other two peaks at about 630.4 eV and 618.9 eV are the  $I 3d_{3/2}$  and  $I 3d_{5/2}$  states of  $I^-$ , and the  $I^{5+}$  and  $I^-$  ions were in  $BiOIO_3$  and  $BiOI$  respectively, suggesting the coexistence of  $BiOIO_3$  and  $BiOI$  in BB NCs.<sup>5</sup> Unlike simple mechanical mixing with no chemical bonding, compared with pure  $BiOIO_3$  and  $BiOI$ , the binding energy of  $I$  in BB NCs shift towards high binding energy, suggested that the interaction between  $BiOIO_3$  and  $BiOI$  at the composite interface did occur, and the XPS spectra can further illustrate the coexistence of  $BiOIO_3$  and  $BiOI$  in BB NCs and the effective composites were formed between the two kinds of the materials.<sup>7,9</sup>

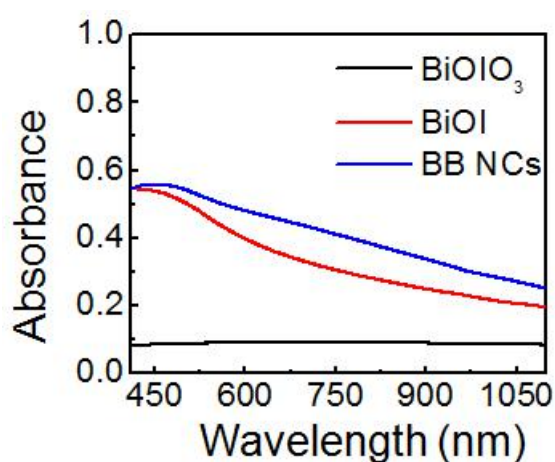

Fig. S10 UV-Vis absorbance of single  $BiOIO_3$ ,  $BiOI$  and BB NCs.

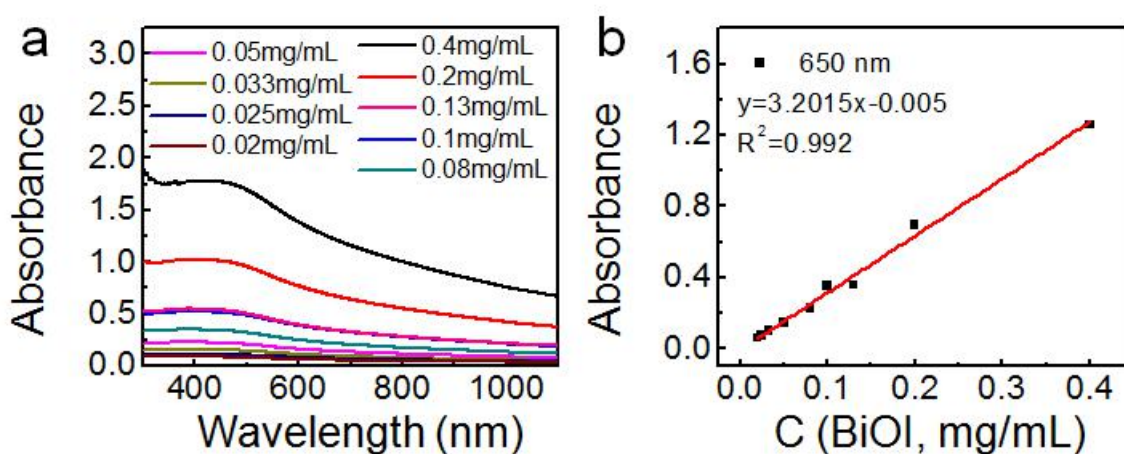

Fig. S11 (a) UV-Vis absorbance of single  $BiOI$  with different concentrations ( $BiOI$  was dispersed in 10 mL of deionized (D.I.) water and disrupted by ultrasonic disruption system (300 W) for 15 min). (b) Standard curve of  $BiOI$ .

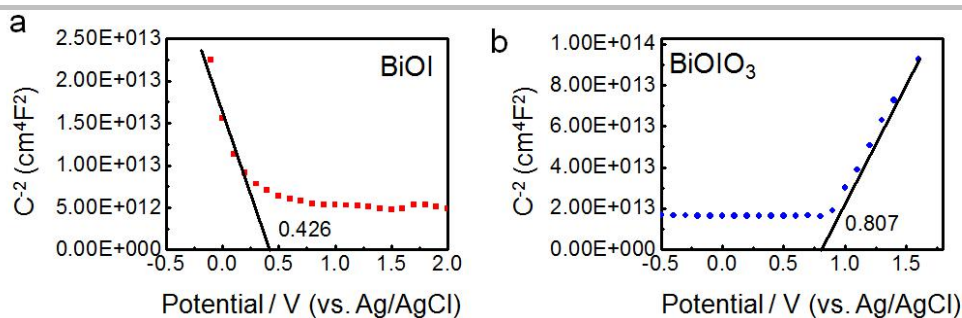

**Fig. S12** Mott-Schottky plots of BiOI (a) and BiOI<sub>3</sub> (b) performed in 1 mol L<sup>-1</sup> Na<sub>2</sub>SO<sub>4</sub> with frequency of 3000 Hz.

The optical properties have been confirmed by UV-vis diffuse reflectance spectroscopy (Fig. 2a). For a semiconductor, the band gap energy is described by the following equation:  $\alpha h\nu = A(h\nu - E_g)^n$ , where  $\alpha$ ,  $E_g$ ,  $\nu$ , and  $h$  represent absorbance, band gap, photon frequency, and Planck's constant.<sup>6</sup> According to Fig. 2b, the band gap energies of BiOI<sub>3</sub> and BiOI are 3.05 eV and 1.70 eV respectively. And BB NCs can be stimulated by 650 nm whose light energy (2.006 eV) is higher than the band gap of BB NCs (1.76 eV). Whatsmore, it is reported that the valence band-edge potential of a semiconductor can be calculated by the empirical equation:  $E_{VB} = \chi - E^e + 0.5E_g$ ,<sup>5</sup>  $\chi$  is the electronegativity of the semiconductor atoms,  $E^e$  is the energy of free electrons on the hydrogen scale (~4.5 eV), and  $E_g$  is the band gap energy of semiconductor. The CB bottom  $E_{CB}$  can be determined by  $E_{CB} = E_{VB} - E_g$ . The  $\chi$  value of BiOI<sub>3</sub> is about 7.04 eV, so the  $E_{VB}$  is calculated to be 4.07 eV, and  $E_{CB}$  is calculated to be 1.02 eV. For BiOI, the  $\chi$  value is 5.99 eV, the  $E_{VB}$  is calculated to be 2.34 eV, and  $E_{CB}$  is calculated to be 0.64 eV. And the schematic band diagram of BiOI and BiOI<sub>3</sub> was shown in Fig. 2c.<sup>9</sup>

M-S method can be employed to determine the semiconductor types of BiOI<sub>3</sub> and BiOI as well as their flat band potential ( $E_{fb}$ ). The slope of linear  $C^{-2}$  vs potential curves is positive for n-type semiconductor and negative for p-type semiconductor. As shown in Fig. S12a, b, the slope of linear  $C^{-2}$ -potential curves of BiOI and BiOI<sub>3</sub> is separately positive and negative, demonstrating that BiOI<sub>3</sub> and BiOI are n-type semiconductor and p-type semiconductor, respectively. Therefore, BiOI and BiOI<sub>3</sub> could form a p-n heterojunction. By extrapolation to  $C^{-2} = 0$ , the flat potentials of BiOI and BiOI<sub>3</sub> are separately determined to be 0.426 and 0.807 V (vs Ag/AgCl, namely, 0.633 V and 1.014 V vs NHE). The CB bottom  $E_{CB}$  can be determined by  $E_{VB} = E_{CB} + E_g$ . The  $E_{VB}$  of BiOI and BiOI<sub>3</sub> are 2.333 eV and 4.064 eV (vs NHE)), respectively.

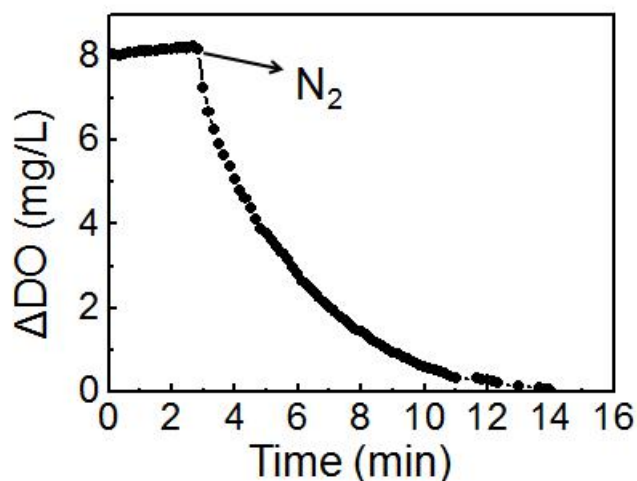

**Fig. S13** Variation of the dissolved oxygen after the administration of  $N_2$ .

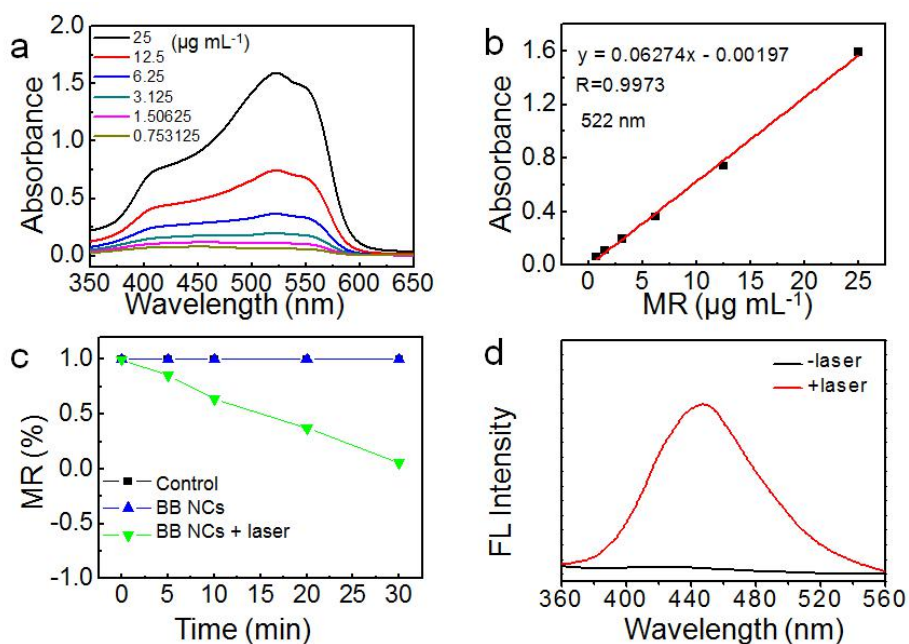

**Fig. S14** (a) The UV-Vis spectra of MR with different concentrations. (b) Standard curve of MR. (c) Photodegradation of MR under irradiation of 650 nm ( $0.5 \text{ W cm}^{-2}$ ) with BB NCs ( $80 \mu\text{g mL}^{-1}$ ). (d) The FL spectra of TA after the irradiation of 650 nm ( $0.5 \text{ W cm}^{-2}$ ) with BB NCs ( $80 \mu\text{g mL}^{-1}$ ).

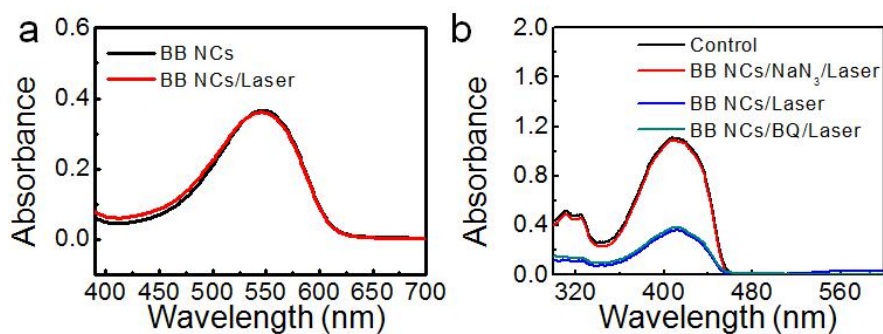

**Fig. S15** (a) Detection of  $\bullet O_2^-$ . (b) Consumption of DPBF in different treatments.



From Fig. S15a, we used “inhibition and produce superoxide anion assay kit” to detect  $\bullet\text{O}_2^-$ , no significant change was discovered. It demonstrates that our prepared BB NCs can't generate  $\bullet\text{O}_2^-$ , which is in accordance with the schematic band diagram theory (Fig. 2c,  $E_{\text{CB}}$  is higher than the  $E_0$  of  $\text{O}_2 / \bullet\text{O}_2^-$  (-0.05 eV)). To further demonstrate that BB NCs can generate  $^1\text{O}_2$  and the BB NCs can't generate  $\bullet\text{O}_2^-$ , we used DPBF (a chemical trapping probe whose absorption at 410 nm would be decreased upon its irreversible reaction with  $^1\text{O}_2$  and  $\bullet\text{O}_2^-$ ) to detect  $^1\text{O}_2$  or  $\bullet\text{O}_2^-$ . Obviously, we found that the absorption of DPBF was significantly decayed in BB NCs solution under the irradiation of 650 nm laser (Fig. S1b), suggesting that BB NCs can generate  $^1\text{O}_2$  or  $\bullet\text{O}_2^-$ . While we used the  $\text{NaN}_3$  to scavenge the  $^1\text{O}_2$ , the absorbance of DPBF was not decayed, and while we used BQ to scavenge the  $\bullet\text{O}_2^-$ , the ratio of decayed DPBF was not changed compared to the BB NCs/Laser group, suggesting that can generate  $^1\text{O}_2$  and the BB NCs can't generate  $\bullet\text{O}_2^-$ .

**Table 1.** Comparison of the X-ray attenuation coefficient of present work.

| Z number | Element | Nanomaterials                                     | X-ray attenuation coefficient | Ref |
|----------|---------|---------------------------------------------------|-------------------------------|-----|
| 42       | Mo      | MoSe <sub>2</sub> hetero-dimensional hybrid (HDH) | 45.69 HU L g <sup>-1</sup>    | R10 |
| 42       | Mo      | Hollow MoS <sub>x</sub>                           | 17.94 HU L g <sup>-1</sup>    | R11 |
| 53       | I       | Iohexol                                           | 51.81 HU L g <sup>-1</sup>    | R12 |
| 53       | I       | Iopromide                                         | 16.4 HU L g <sup>-1</sup>     | R13 |
| 55, 74   | Cs, W   | Cs <sub>x</sub> WO <sub>3</sub> NR@PEM            | 68.48 HU L g <sup>-1</sup>    | R12 |
| 70       | Yb      | GdOF:Ln@SiO <sub>2</sub>                          | 123.58 HU L g <sup>-1</sup>   | R14 |
| 73       | Ta      | polymer-coated TaOx NPs                           | 6.0 HU mM <sup>-1</sup>       | R15 |
| 74       | W       | WS <sub>2</sub> :Gd <sup>3+</sup> PEG             | 25.9 HU L g <sup>-1</sup>     | R16 |
| 74       | W       | WS <sub>2</sub> quantum dots                      | 37.73 HU L g <sup>-1</sup>    | R17 |
| 74       | W       | Rb <sub>x</sub> WO <sub>3</sub> Nanorods          | 38.66 HU L g <sup>-1</sup>    | R18 |
| 75       | Re      | rhenium trioxide nanocubes                        | 10.82 HU mM <sup>-1</sup>     | R19 |
| 77       | Ir      | IrO <sub>2</sub>                                  | 11.51 HU mM <sup>-1</sup>     | R20 |
| 79       | Au      | Au@MSNs-ICG NPs                                   | 38.00 HU L g <sup>-1</sup>    | R21 |
| 79, 78   | Au, Pt  | Au@Pt Nanodendrites                               | 28.6 HU L g <sup>-1</sup>     | R22 |

|    |    |                                           |                            |           |
|----|----|-------------------------------------------|----------------------------|-----------|
| 83 | Bi | PVP-coated Bi <sub>2</sub> S <sub>3</sub> | 9.3 HU mM <sup>-1</sup>    | R23       |
| 83 | Bi | BB NCs                                    | 41.39 HU L g <sup>-1</sup> | This work |

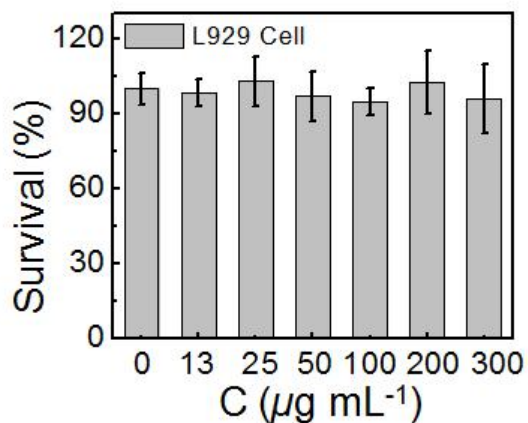

**Fig. S16** Survival rate of L929 cells after incubated with BB NCs with different concentrations for 24 h under normoxia condition.

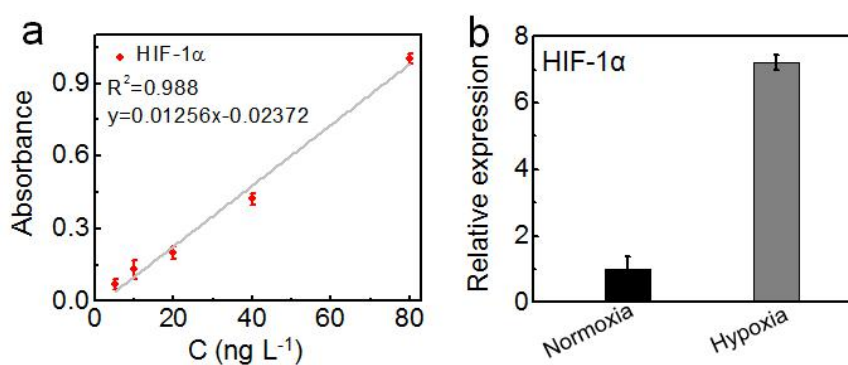

**Fig. S17** (a) Standard curve of HIF-1α. (b) Variation of the HIF-1α after HeLa cells incubated at hypoxia condition (2% O<sub>2</sub>) and normoxia condition (21% O<sub>2</sub>).

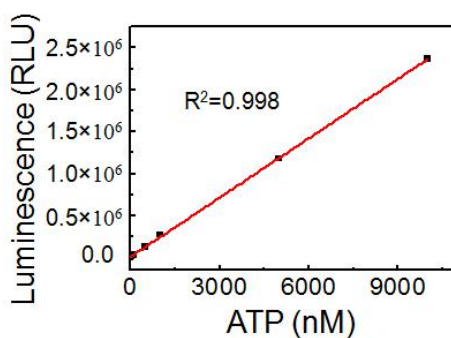

**Fig. S18** Standard curve of ATP.

**Table 2.** The dose of present type I PDT photocatalytic nanomaterials used at in vivo tumor model.

| Type of PDT | Nanomaterials                                                              | Laser                                     | Dose                            | Dose (mg kg <sup>-1</sup> ) | Ref |
|-------------|----------------------------------------------------------------------------|-------------------------------------------|---------------------------------|-----------------------------|-----|
| I           | BiOI@Bi <sub>2</sub> S <sub>3</sub> @BSA                                   | X-ray                                     | 20 μL, 2 mg mL <sup>-1</sup>    | 1.6                         | R24 |
|             | CeIII-doped LiYF <sub>4</sub> @SiO <sub>2</sub> @ZnO structure             | X-ray                                     | 100 μL, 1 mg mL <sup>-1</sup>   | 4                           | R25 |
|             | Hollow cerium oxide upconversion nanoparticles                             | 980 nm (Not Given), 20 min                | 200 μL, 0.1 mg mL <sup>-1</sup> | 0.8                         | R26 |
|             | TiO <sub>2</sub> @Y <sub>2</sub> Ti <sub>2</sub> O <sub>7</sub> @YOF:Yb,Tm | 980 nm (0.72 W cm <sup>-2</sup> ), 10 min | 100 μL, 1 mg mL <sup>-1</sup>   | 4                           | R27 |
|             | Fe@γ-Fe <sub>2</sub> O <sub>3</sub> @H-TiO <sub>2</sub> Nanocomposites     | 808 nm (2 W cm <sup>-2</sup> ), 5 min     | 100 μL, 2 mg mL <sup>-1</sup>   | 8                           | R28 |
|             | (UCNPs)@TiO <sub>2</sub> @MnO <sub>2</sub> core/shell/sheet nanocomposites | 980 nm (2 W cm <sup>-2</sup> ), 10 min    | 200 μL, 1 mg mL <sup>-1</sup>   | 8                           | R29 |
|             | bismuth ferrite nanoparticles                                              | 880 nm (2 W cm <sup>-2</sup> ), 10 min    | 100 μL, 3 mg mL <sup>-1</sup>   | 12                          | R30 |
|             | (G-TiO <sub>2-x</sub> -TPP)                                                | 980 nm (0.72 W cm <sup>-2</sup> ), 5 min  | Not Given                       | 8                           | R31 |
|             | (UCNPs)-platinum(IV) (Pt(IV))-ZnFe <sub>2</sub> O <sub>4</sub>             | 980 nm (0.5 W cm <sup>-2</sup> ), 15 min  | 100 μL, 4 mg mL <sup>-1</sup>   | 16                          | R32 |
| II          | Cu <sub>2</sub> (OH)PO <sub>4</sub> @PAA QDs                               | 1064 nm (2 W cm <sup>-2</sup> ), 10 min   | 100 μL, 1 mg mL <sup>-1</sup>   | 4                           | R33 |
|             | metal-organic frameworks and                                               | 980 nm (1.2 W cm <sup>-2</sup> ), 5 min   | Not Given                       | 59                          | R34 |

|   |                                                   |                                        |                                 |                      |              |
|---|---------------------------------------------------|----------------------------------------|---------------------------------|----------------------|--------------|
|   | lanthanide-doped<br>upconversion<br>nanoparticles |                                        |                                 |                      |              |
|   | PEGylated $W_{18}O_{49}$<br>Nanowires             | 880 nm (0.2 W<br>$cm^{-2}$ ), 10 min   | Not Given                       | 15                   | R35          |
|   | Tellurium Nanodots                                | 785 nm (1.5 W<br>$cm^{-2}$ ), 5 min    | Not Given                       | 50 $\mu mol kg^{-1}$ | R36          |
|   | BSA-IrO <sub>2</sub><br>nanoparticles             | 808 nm (1 W<br>$cm^{-2}$ ), 10 min     | 200 $\mu L$ , 1.5 $mmol L^{-1}$ | 12 $\mu mol kg^{-1}$ | R20          |
|   | copper ferrite<br>nanospheres                     | 650 nm (0.469<br>W $cm^{-2}$ ), 10 min | 300 $\mu L$ , 0.2 $mg mL^{-1}$  | 2.4                  | R37          |
| I | BB NCs                                            | 650 nm (0.5 W<br>$cm^{-2}$ ), 15 min   | 200 $\mu L$ , 0.08 $mg mL^{-1}$ | 0.64                 | This<br>work |

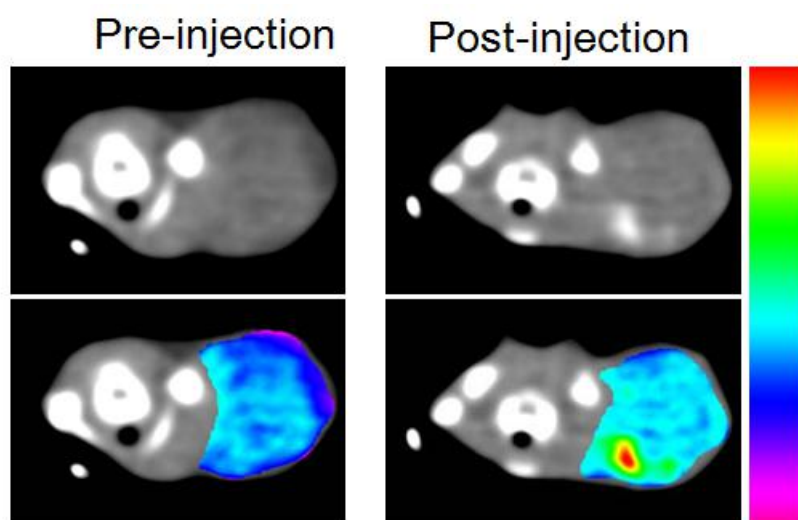

**Fig. S19** 2D CT images of tumor-bearing mice before and after injection of BB NCs.

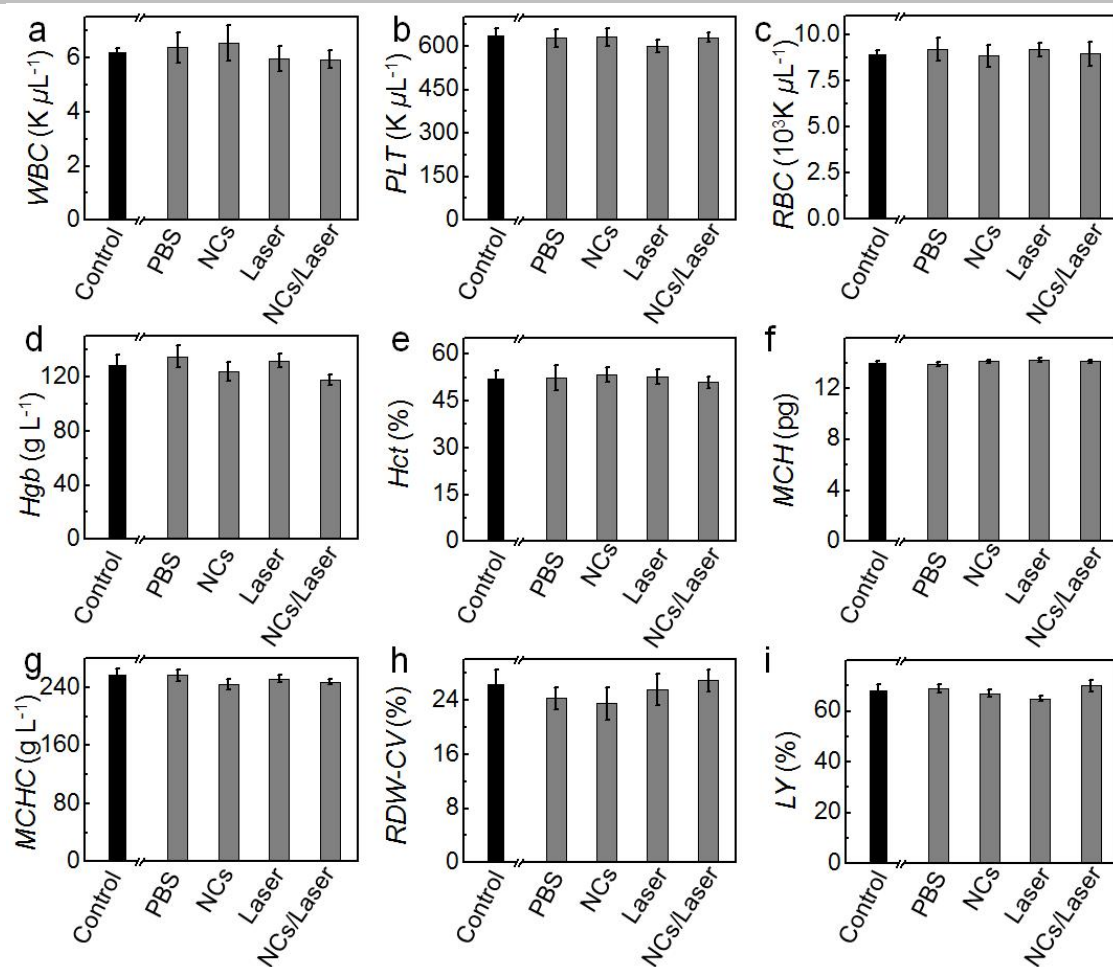

Fig. S20 Hematology analysis of mice with different treatments.

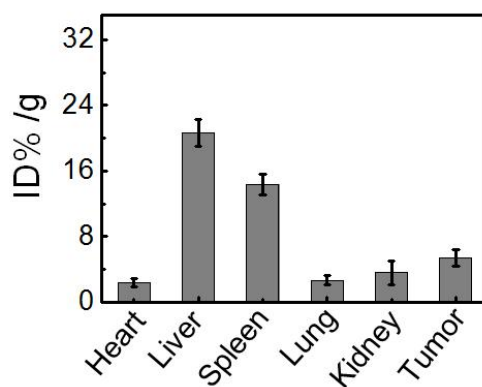

Fig. S21 Tissue distribution of BB NCs.

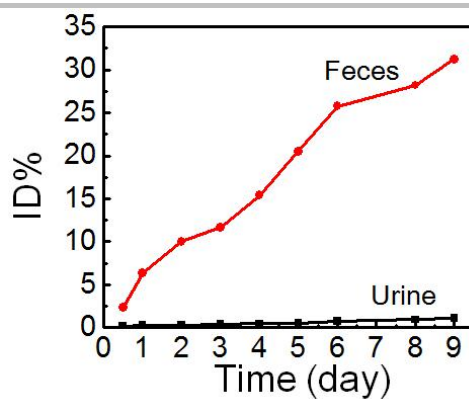

**Fig. S22** Total content of BB NCs in urine and feces collected at various time points after intravenous injection.

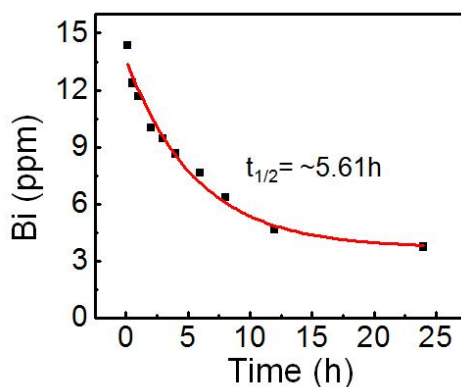

**Fig. S23** Concentration of Bi element in blood after intravenous injection at different time points.

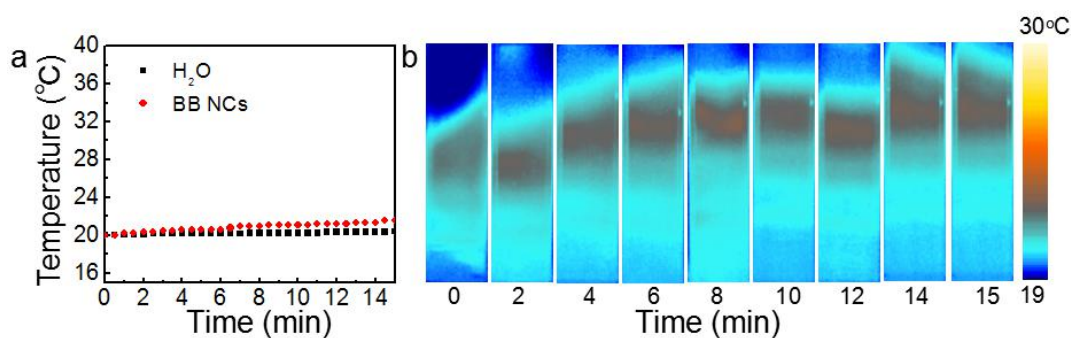

**Fig. S24** (a) Temperature variation of H<sub>2</sub>O and BB NCs aqueous solution (80 μg mL<sup>-1</sup>) upon the irradiation of laser (650 nm, 0.5 W cm<sup>-2</sup>) for 15 min. (b) Thermal imaging of BB NCs aqueous solution (80 μg mL<sup>-1</sup>) under the illumination of laser at different time points.

To guarantee light power density we used will not produce the photothermal response and complicate the phototherapeutic outcome, the variation of temperature of BB NCs under the illumination of 650 nm laser at 0.5 Wcm<sup>-2</sup> was evaluated. As shown in Fig. S24, compared to the H<sub>2</sub>O group, the BB NCs aqueous solution don't have significant increasement of temperature.

---

## References

- [1] H. O. Ha, D. S. Kim, *J. Appl. Polym. Sci.* **2016**, *133*, 1-7.
- [2] S. A. Jabin, *J. Bangladesh, Sci. Ind. Res.* **2009**, *44*, 225-228.
- [3] F. J. R. Hird, J. R. Yates, *Biochem. J.* **1961**, *80*, 612-616.
- [4] X. M. Qi, M. L. Gu, X. Y. Zhu, J. Wu, H. M. Long, K. He, Q. Wu, *Chem. Eng. J.* **2016**, *285*, 11-19.
- [5] F. Dong, T. Xiong, Y. Sun, Y. Zhang, Y. Zhou, *Chem. Commun.* **2015**, *51*, 8249-8252.
- [6] H. Huang, K. Xiao, K. Liu, S. Yu, Y. Zhang, *Cryst. Growth Des.* **2016**, *16*, 221-228.
- [7] R. Zhou, J. Wu, J. Zhang, H. Tian, P. Liang, T. Zeng, P. Lu, J. Ren, T. Huang, X. Zhou, P. Sheng, *Appl. Catal. B-Environ.* **2017**, *204*, 465-474.
- [8] (a) K. H. Reddy, S. Martha, K. M. Parida, *Inorg. Chem.* **2013**, *52*, 6390-6401; (b) W. He, H. Jia, W. G. Wamer, Z. Zheng, P. Li, J. H. Callahan, J. Yin, *J. Catal.* **2014**, *320*, 97-105; (c) H. He, S. P. Berglund, P. Xiao, W. D. Chemelewski, Y. Zhang, C. B. Mullins, *J. Mater. Chem. A*, **2013**, *1*, 12826-12834; (d) S. Zhang, J. Li, X. Wang, Y. Huang, M. Zeng, J. Xu, *J. Mater. Chem. A*, **2015**, *3*, 10119-10126; d) X. Yu, S. Wang, X. Zhang, A. Qi, X. Qiao, Z. Liu, M. Wu, L. Li, Z. Wang, *Nano Energy* **2018**, *46*, 29-38.
- [9] X. Sun, J. Wu, Q. Li, Q. Liu, Y. Qi, L. You, Z. Ji, P. He, P. Sheng, J. Ren, W. Zhang, J. Lu, J. Zhang, *Appl. Catal. B-Environ.* **2017**, *218*, 80-90.
- [10] B. Mao, T. Bao, J. Yu, L. Zheng, J. Qin, W. Yin, M. Cao, *Nano Res.* **2017**, *10*, 2667-2682.
- [11] J. Wang, L. Liu, Q. You, Y. Song, Q. Sun, Y. Wang, Y. Cheng, F. Tan, N. Li, *Theranostics* **2018**, *8*, 955-971.
- [12] W. Guo, C. Guo, N. Zheng, T. Sun, S. Liu, *Adv. Mater.* **2017**, *29*, 1604157.
- [13] Z. Li, J. Liu, Y. Hu, K. A. Howard, Z. Li, X. Fan, M. Chang, Y. Sun, F. Besenbacher, C. Chen, M. Yu, *ACS Nano* **2016**, *10*, 9646-9658.
- [14] R. Lv, P. Yang, F. He, S. Gai, C. Li, Y. Dai, G. Yang, J. Lin, *ACS Nano*, **2015**, *9*, 1630-1647.
- [15] M. H. Oh, N. Lee, H. Kim, S. P. Park, Y. Piao, J. Lee, S. W. Jun, W. K. Moon, S. H. Choi, T. Hyeon, *J. Am. Chem. Soc.* **2011**, *133*, 5508-5515.
- [16] L. Cheng, C. Yuan, S. Shen, X. Yi, H. Gong, K. Yang, Z. Liu, *ACS Nano*, **2015**, *9*, 11090-11101.
- [17] Y. Yong, X. Cheng, T. Bao, M. Zu, L. Yan, W. Yin, C. Ge, D. Wang, Z. Gu, Y. Zhao, *ACS Nano*, **2015**, *9*, 12451-12463.
- [18] G. Tian, X. Zhang, X. Zheng, W. Yin, L. Ruan, X. Liu, L. Zhou, L. Yan, S. Li, Z. Gu, Y. Zhao, *Small* **2014**, *10*, 4160-4170.
- [19] W. Zhang, G. Deng, B. Li, X. Zhao, T. Ji, G. Song, Z. Xiao, Q. Cao, J. Xiao, X. Huang, G. Guan, R. Zou, X. Lu, J. Hu, *Biomaterials* **2018**, *159*, 68-81.
- [20] W. Zhen, Y. Liu, L. Lin, J. Bai, X. Jia, H. Tian, X. Jiang, *Angew. Chem. Int. Ed.* **2018**, *57*, 10309-10313.
- [21] C. Zeng, W. Shang, X. Liang, X. Liang, Q. Chen, C. Chi, Y. Du, C. Fang, J. Tian, *ACS Appl. Mater. Inter.* **2016**, *8*, 29232-29241.
- [22] X. Liu, X. Zhang, M. Zhu, G. Lin, J. Liu, Z. Zhou, X. Tian, Y. Pan, *ACS Appl. Mater. Inter.* **2017**, *9*, 279-285.
- [23] O. Rabin, J. M. Perez, J. Grimm, G. Wojtkiewicz, R. Weissleder, *Nat. Mater.* **2006**, *5*, 118-122.
- [24] Z. Guo, S. Zhu, Y. Yong, X. Zhang, X. Dong, J. Du, J. Xie, Q. Wang, Z. Gu, Y. Zhao, *Adv. Mater.* **2017**, *29*, 1704136.
- [25] C. Zhang, K. Zhao, W. Bu, D. Ni, Y. Liu, J. Feng, J. Shi, *Angew. Chem. Int. Ed.* **2015**, *54*, 1770-1774.
- [26] C. Yao, W. Wang, P. Wang, M. Zhao, X. Li, F. Zhang, *Adv. Mater.* **2018**, *30*, 1704833.
- [27] R. Lv, C. Zhong, R. Li, P. Yang, F. He, S. Gai, Z. Hou, G. Yang, J. Lin, *Chem. Mater.* **2015**, *27*, 1751-1763.
- [28] M. Wang, K. Deng, W. Lü, X. Deng, K. Li, Y. Shi, B. Ding, Z. Cheng, B. Xing, G. Han, Z. Hou, J. Lin, *Adv. Mater.* **2018**, *30*, 1706747.
- [29] C. Zhang, W. Chen, L. Liu, W. Qiu, W. Yu, X. Zhang, *Adv. Funct. Mater.* **2017**, *27*, 1700626.
- [30] C. Yang, Y. Chen, W. Guo, Y. Gao, C. Song, Q. Zhang, N. Zheng, X. Han, C. Guo, *Adv. Funct. Mater.* **2018**, *28*, 1706827.
- [31] J. Mou, T. Lin, F. Huang, J. Shi, H. Chen, *Theranostics* **2017**, *7*, 1531-1542.
- [32] H. Bi, Y. Dai, P. Yang, J. Xu, D. Yang, S. Gai, F. He, B. Liu, C. Zhong, G. An, J. Lin, *Small* **2018**, *14*, 1703809.
- [33] W. Guo, Z. Qiu, C. Guo, D. Ding, T. Li, F. Wang, J. Sun, N. Zheng, S. Liu, *ACS Appl. Mater. Inter.* **2017**, *9*, 9348-9358.
- [34] Y. Li, Z. Di, J. Gao, P. Cheng, C. Di, G. Zhang, B. Liu, X. Shi, Li. Sun, L. Li, C. Yan, *J. Am. Chem. Soc.* **2017**, *139*, 13804-13810.
- [35] P. Kalluru, R. Vankayala, C. Chiang, K. C. Hwang, *Angew. Chem. Int. Ed.* **2013**, *52*, 12332-12336.
- [36] T. Yang, H. Ke, Q. Wang, Y. Tang, Y. Deng, H. Yang, X. Yang, P. Yang, D. Ling, C. Chen, Y. Zhao, H. Wu, H. Chen, *ACS Nano* **2017**, *11*, 10012-10024.
- [37] Y. Liu, W. Zhen, L. Jin, S. Zhang, G. Sun, T. Zhang, X. Xu, S. Song, Y. Wang, J. Liu, H. Zhang, *ACS Nano* **2018**, *12*, 4886-4893.
